# Supplementary material
Source: Springer Nature journal article supplement (https://www.springermedizin.de/resource/supplementary/12957_2008_516_MOESM1_ESM.pdf/9564894)

Ex: 13439

Se: 2

XY I154.02

Te: 21

82117794 C q e

M 82117794

Aug 15 2006

512

MF:1.1

DFOV 41.9cm

STND/+

OSE:gl

R  
1  
8  
8L  
1  
9  
3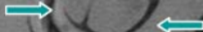

kV 120

mA 398

Noise Index: 8.1

Large

10.000mm/27.00 1.35:1

Tilt: 0.0

0.8s /HE+ 04:31:00/05.93

V:400 I:40

P 190

Supplement: MOESM1 [file 9564894]
